# Supplementary material for: Flavonols modulate lateral root emergence by scavenging reactive oxygen species in Arabidopsis thaliana
Source: PubMed Central journal article supplement (PMC7948594; doi:10.1074/jbc.ra120.014543), 2020-12-25
Supplement: mmc1.pdf [file mmc1.pdf]

**Flavonols modulate lateral root emergence by scavenging reactive oxygen species in *Arabidopsis thaliana***

Jordan M. Chapman and Gloria K. Muday

**Supporting Information**

**Table S1-S2**

**Figure S1- Figure S5**

| <b>Table S1: MS verification data of flavonoid compounds</b> |                       |                      |                                        |
|--------------------------------------------------------------|-----------------------|----------------------|----------------------------------------|
| Flavonoid (Massbank spectra comparison)                      | m/z (mass per charge) | Retention time (min) | Fragment ions                          |
| Naringenin (ML005001)                                        | 273.0752              | 12.52                | 147.002, 152.91, 163.2, 189.08         |
| Kaempferol (PB004121)                                        | 287.0555              | 12.78                | 105.08, 111.01, 132.94, 165.03, 212.96 |
| Quercetin (PR306547)                                         | 303.0500              | 11.30                | 93.04, 120.98, 149.001, 187.02, 201.10 |
| Isorhamnetin (PT104010)                                      | 317.0660              | 12.92                | 153.03, 229.16, 245.12, 285.02, 302.05 |

| <b>Table S2: Quantification of flavonoids in roots of 7-day old seedlings by liquid chromatography mass spectrometry in nmole/gfw and abundance is reported relative to the wild-type level.</b>                                                                                                        |            |             |             |              |             |
|---------------------------------------------------------------------------------------------------------------------------------------------------------------------------------------------------------------------------------------------------------------------------------------------------------|------------|-------------|-------------|--------------|-------------|
|                                                                                                                                                                                                                                                                                                         | Naringenin | Kaempferol  | Quercetin   | Isorhamnetin | Total       |
| <i>tt4-11</i> (CHS-GFP)                                                                                                                                                                                                                                                                                 | N.D.       | 0.75 ± 0.30 | 0.79 ± 0.29 | 0.72 ± 0.22  | 0.78 ± 0.28 |
| Statistics were measured by an unpaired t-test between the <i>tt4-11</i> (CHS-GFP) samples and Col-0 (there is no statistical differences). N.D indicates values that were not detected because they were below the lowest concentration on the standard curve in both Col-0 and the complemented line. |            |             |             |              |             |

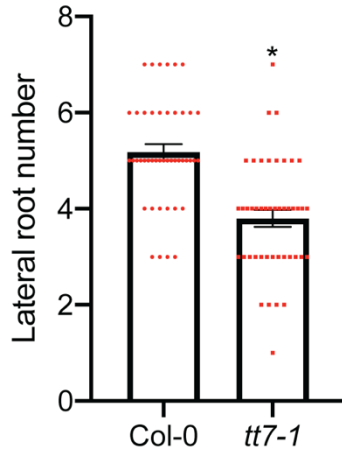

**Figure S1:** Lateral root numbers are reduced in a second *tt7* mutant. Lateral root number was measured in another *tt7* allele, *tt7-1* over three replicates with an n=45. Significance was determined using an unpaired t-test. (\*p<0.0001)

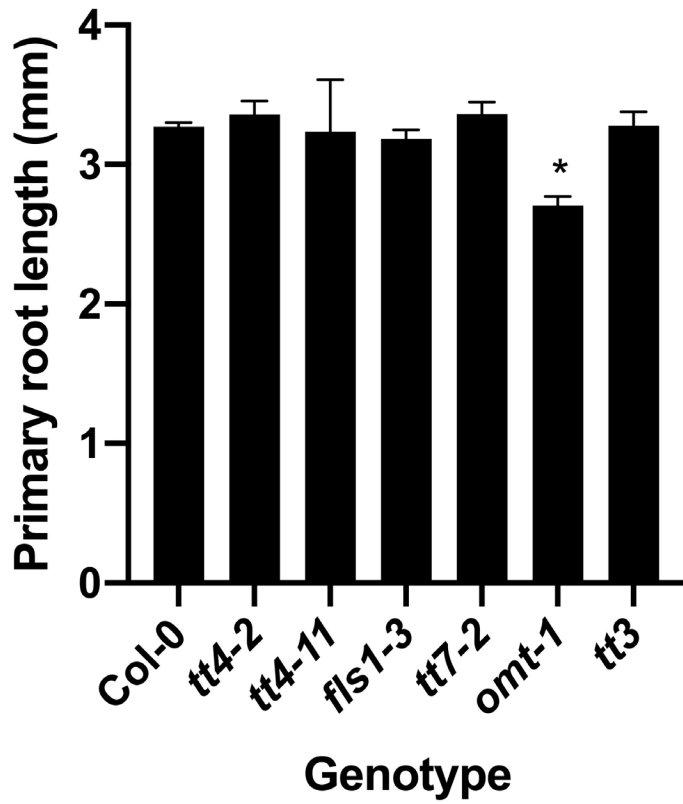

**Figure S2:** (A) Primary root length is similar in all mutants except *omt-1*, which has significantly shorter primary roots. Primary root length was measured in 8-day old seedlings. Statistics were measured using a one-way ANOVA followed by a Dunnett's multiple comparisons test. (\* $p < 0.0001$ ).

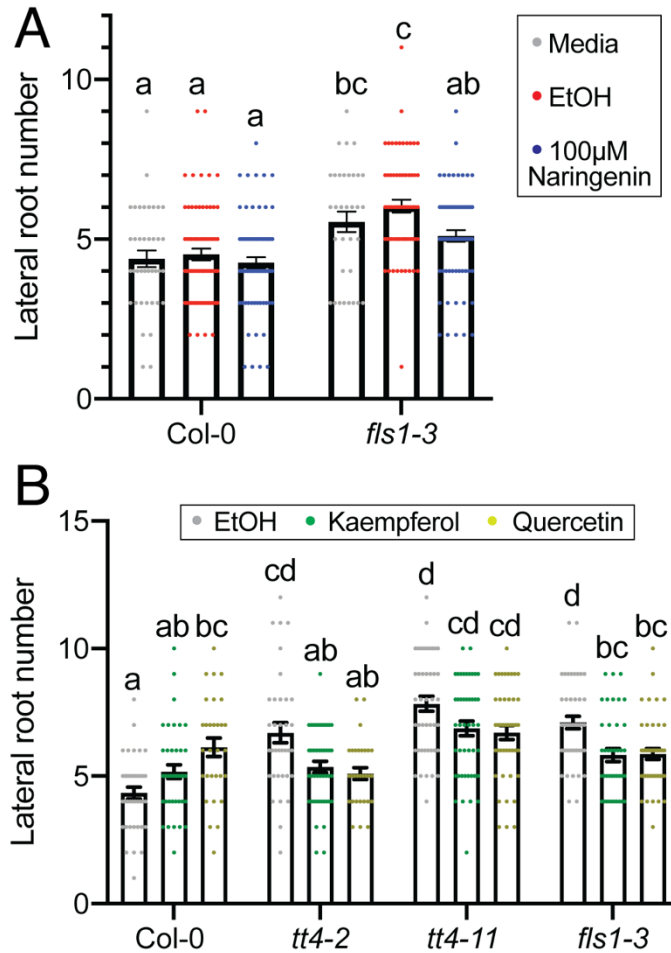

**Figure S3:** Flavonol treatment reduces lateral root number in flavonol deficient mutants. (A) Lateral root number was evaluated after a three-day treatment with 100 µM naringenin. The naringenin was suspended in ethanol, therefore an ethanol control and a general media control are both reported. Statistics were measured using a two-way ANOVA followed by a Tukey post-hoc test  $p < 0.05$ . Bars with the same letter represent no statistical difference, while different letters indicate values that are significantly different. (B) Lateral root number was quantified for 8-day old seedlings after a 3-day treatment with either kaempferol or quercetin with four replicates. This gave an n of: Col-0 (control: n=40, kaempferol: n=40, quercetin: n=40), *tt4-2* (control: n=35, kaempferol: n=45, quercetin: n=30), *tt4-11* (control: n=45, kaempferol: n=45, quercetin: n=44), *fls1-3* (control: n=45, kaempferol: n=40, quercetin: n=45). Statistical analyses were performed using a 2-way ANOVA with a Tukey's post-hoc test. Bars with different letters indicate statistical significance.

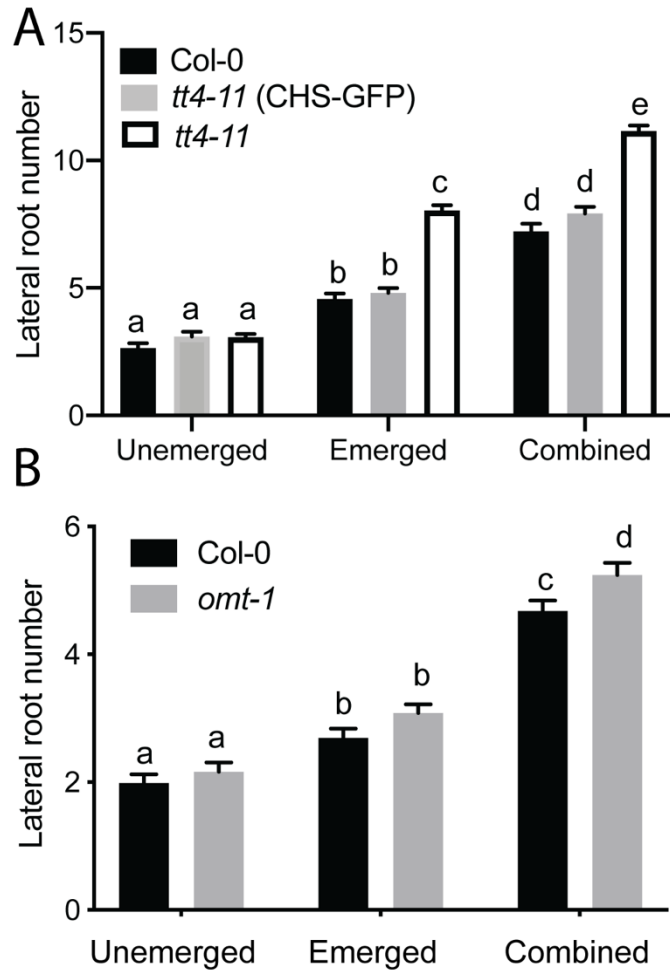

**Figure S4:** Lateral root emergence is increased in *tt4-11*, but not affected in *omt-1*. (A) The *tt4-11* mutant has increased emerged lateral roots, but wild-type levels of lateral root primordia. The lateral root primordia (stage4-7) were quantified in cleared 7-day old roots. Statistical differences were determined with a one-way ANOVA. Bars with the same letter represent no statistical difference for each category: unemerged (a), emerged (b-c) and combined (d-e), while different letters indicate values that are significantly different with a  $p < 0.05$ . (B) Lateral root primordia are comparable between wild type and *omt-1*. The number of lateral primordia (Stages 4-7) and emerged lateral roots, and the combined totals were quantified in cleared 7-day old seedlings. The average and SE from four separate experiments with a total  $n=60-69$ . Statistics were determined using an unpaired t-test between genotypes.

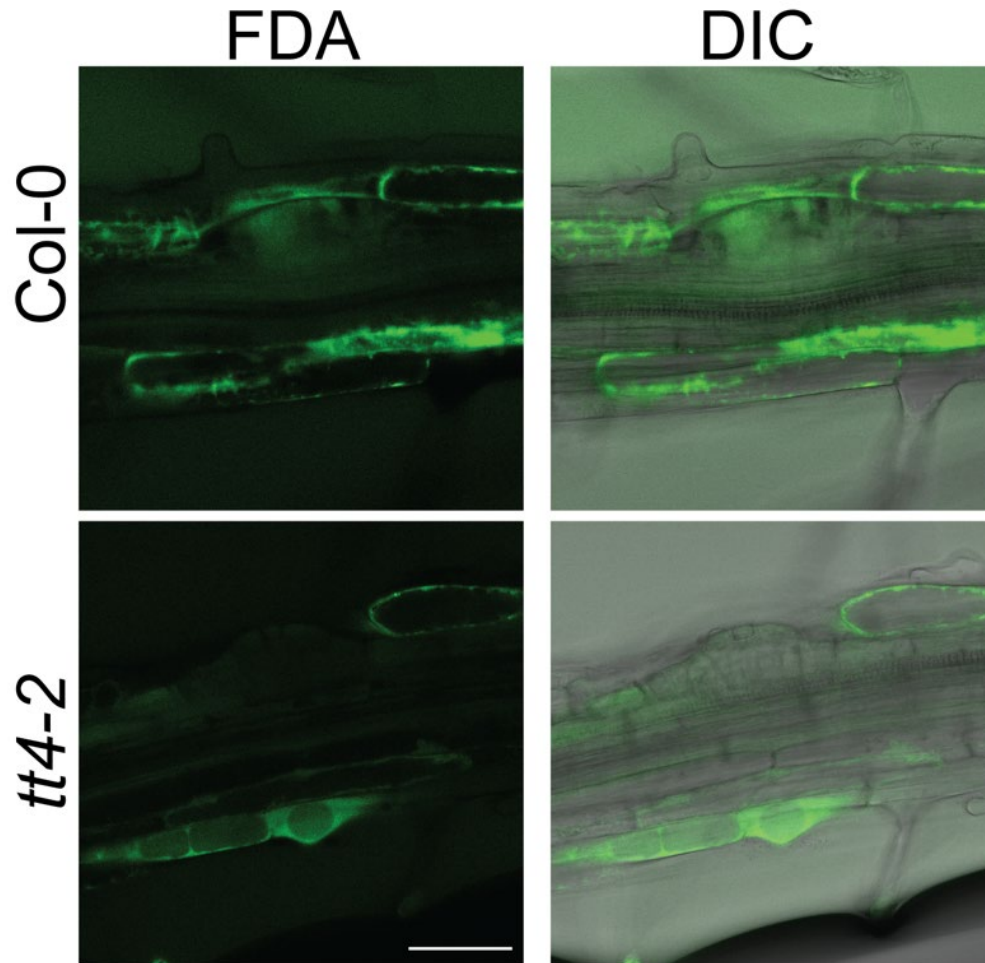

**Figure S5:** FDA is able to enter later stage lateral root primordia. 8-day old seedlings were stained with FDA and imaged using the same settings across 2 replicates. LRP from stage 2 to stage 8 were evaluated based on their ability to take up FDA. LRP stage 3 and below were unable to take up the FDA. Therefore, experiments using DCF only evaluated stage 4 and higher LRP. Scale bar: 50 $\mu$ m.
